# Supplementary material for: Identification and validation of cellular senescence patterns to predict clinical outcomes and immunotherapeutic responses in lung adenocarcinoma
Source: PubMed Central journal article supplement (PMC8647370; doi:10.1186/s12935-021-02358-0), 2021-12-06
Supplement: 12935_2021_2358_MOESM5_ESM.pdf [file 12935_2021_2358_MOESM5_ESM.pdf]

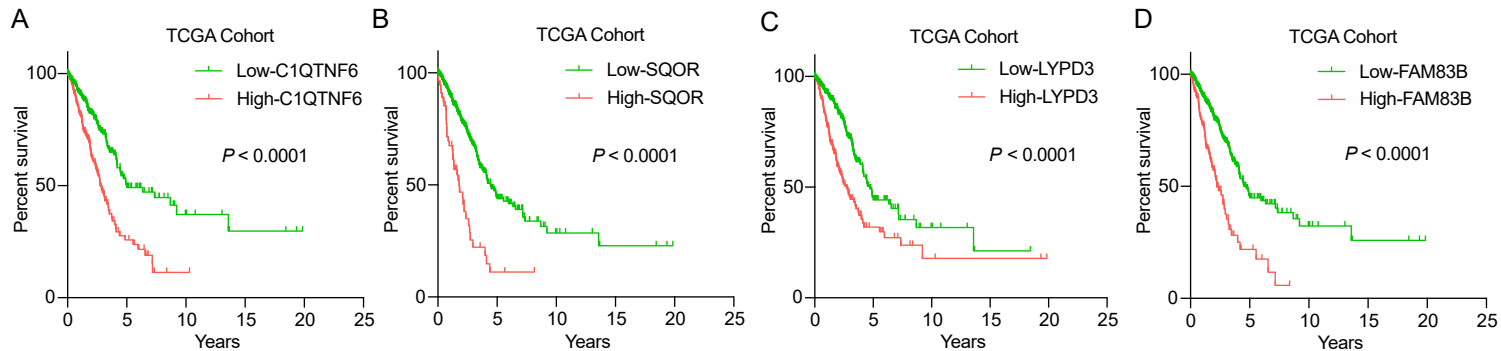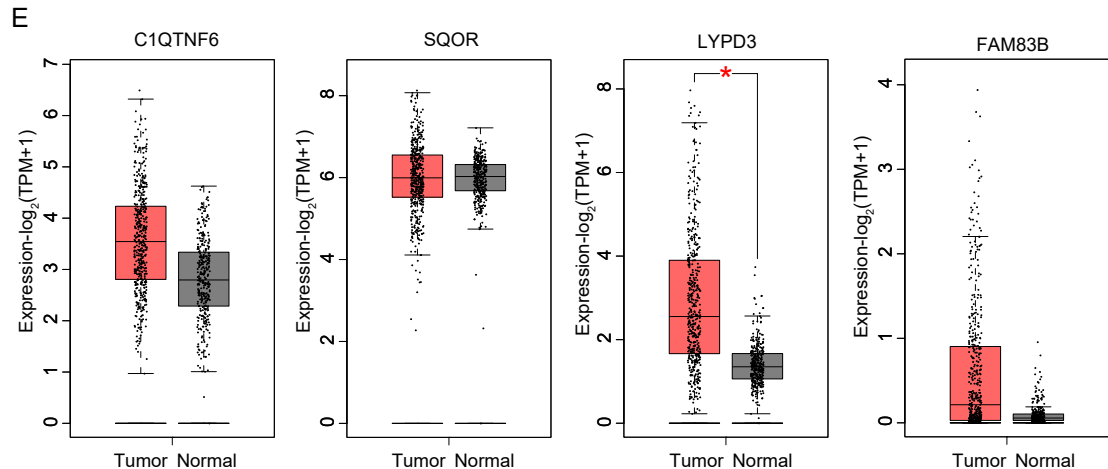

**F**
